# Supplementary material for: EIF4A3-Induced circ-BNIP3 Aggravated Hypoxia-Induced Injury of H9c2 Cells by Targeting miR-27a-3p/BNIP3
Source: PubMed Central journal article supplement — Mol Ther Nucleic Acids. 2019 Nov 26;19:533–45. doi: 10.1016/j.omtn.2019.11.017 (PMC6951839; doi:10.1016/j.omtn.2019.11.017), 2019-11-26

OMTN, Volume 19

## **Supplemental Information**

### **EIF4A3-Induced circ-BNIP3 Aggravated Hypoxia-Induced Injury of H9c2 Cells by Targeting miR-27a-3p/BNIP3**

**Yansong Li, Shuhong Ren, Jingwen Xia, Yong Wei, and Yinhua Xi**

**Supplementary Figure 1** (A) The expression level of circ-BNIP3 in neonatal rat ventricular cardiomyocyte (NRVM) in response to hypoxia. (B) The expression level of EIF4A3 in H9c2 cell and neonatal cardiomyocyte in response to hypoxia. **\*\*P < 0.01.**

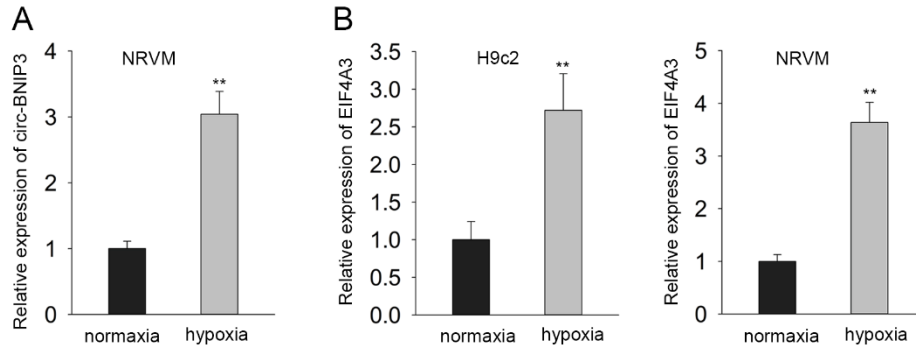

Supplement: mmc1.pdf [file mmc1.pdf]
